# Supplementary material
Source: PubMed Central journal article supplement (PMC6535555)
Supplement: AAC.02607-18-s0001.pdf [file AAC.02607-18-s0001.pdf]

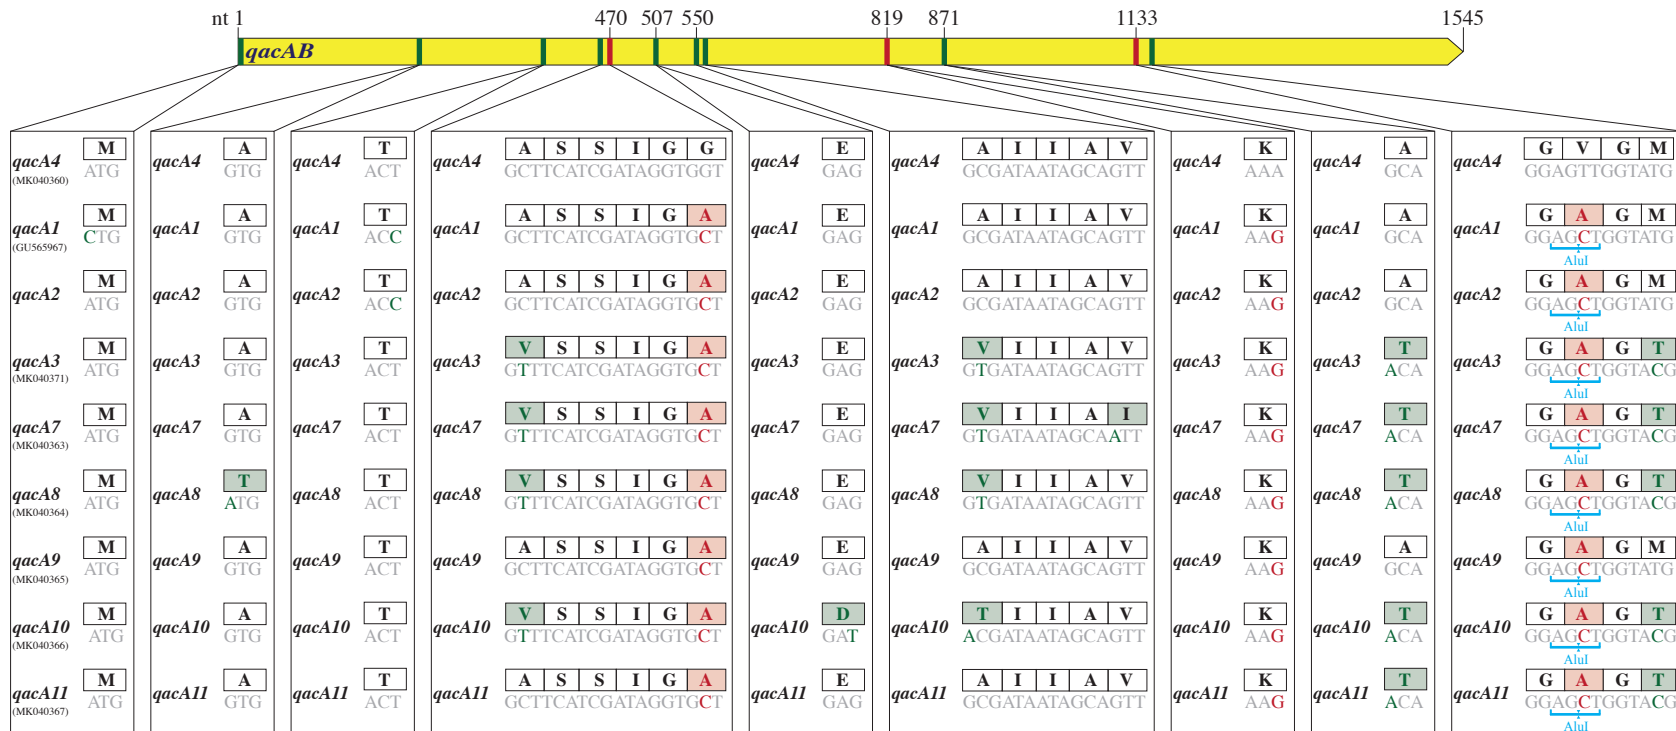

**Figure S1.** Comparison of the sequences of *qacA4* (MK040360), the 3 previously described *qacA* alleles (*qacA1*, *qacA2*, *qacA3*; Alam et al., 2003), and the 5 novel *qacA* alleles identified in the *qacA*-positive control isolates without elevated CHG MICs sequenced in this study. The associated AluI restriction sites are shown below the nucleotide sequences and the corresponding amino acid sequences are displayed in the boxes above the nucleotide sequences. The nucleotides which distinguish *qacA4* from all other alleles are highlighted in red. Those which distinguish one or more of these alleles from *qacA4* are displayed in green.

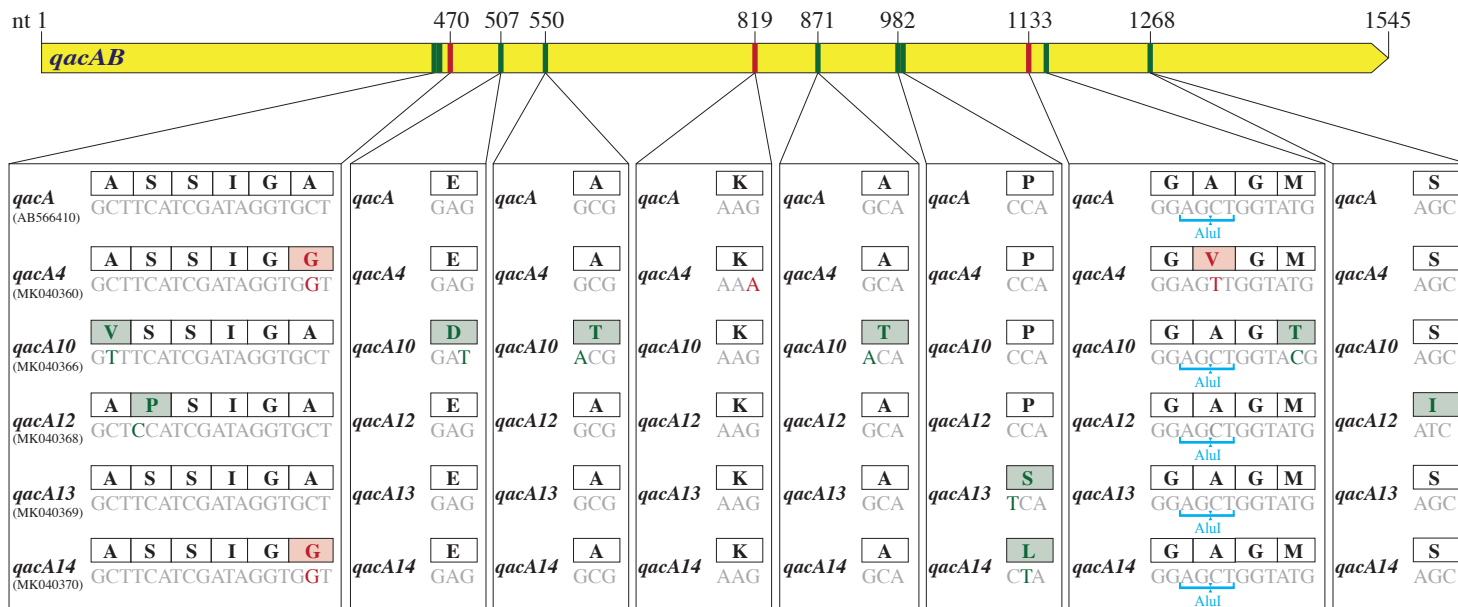

**Figure S2.** Comparison of the sequences of the reference *qacA* (AB566410), *qacA4* (MK040360), and the 4 novel *qacA* alleles identified in the *qacA*-positive isolates with elevated CHG MICs. The associated AluI restriction sites are shown below the nucleotide sequences and the corresponding amino acid sequences are displayed in the boxes above the nucleotide sequences. The nucleotides which distinguish *qacA4* from the reference *qacA* are highlighted in red. Those which distinguish the novel alleles from *qacA4* and the reference *qacA* are displayed in green.

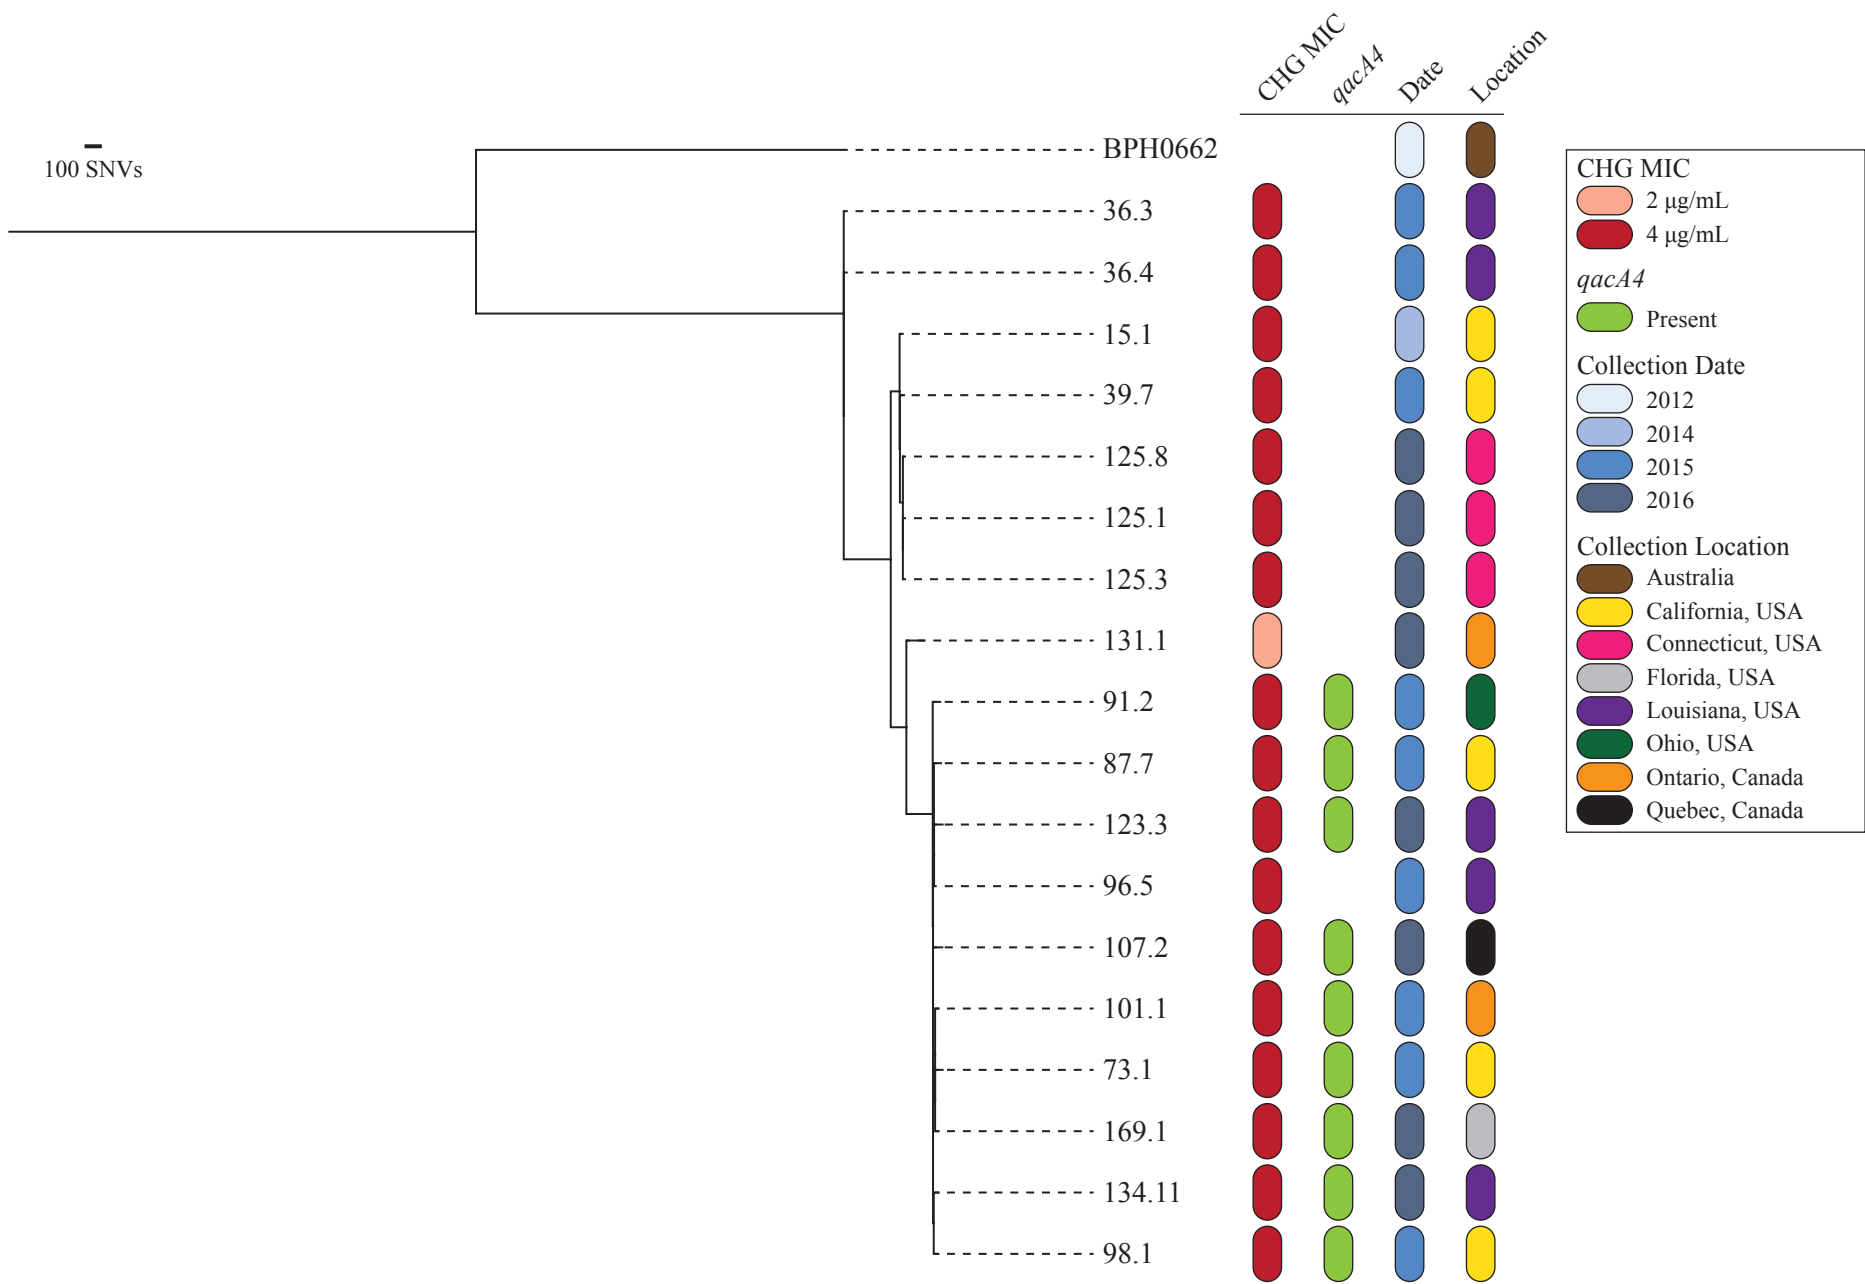

**Figure S3.** Phylogenetic tree produced from a core genome analysis of 9 *qacA4*-carrying and 9 non-*qacA4*-carrying *S. epidermidis* ST2 isolates.

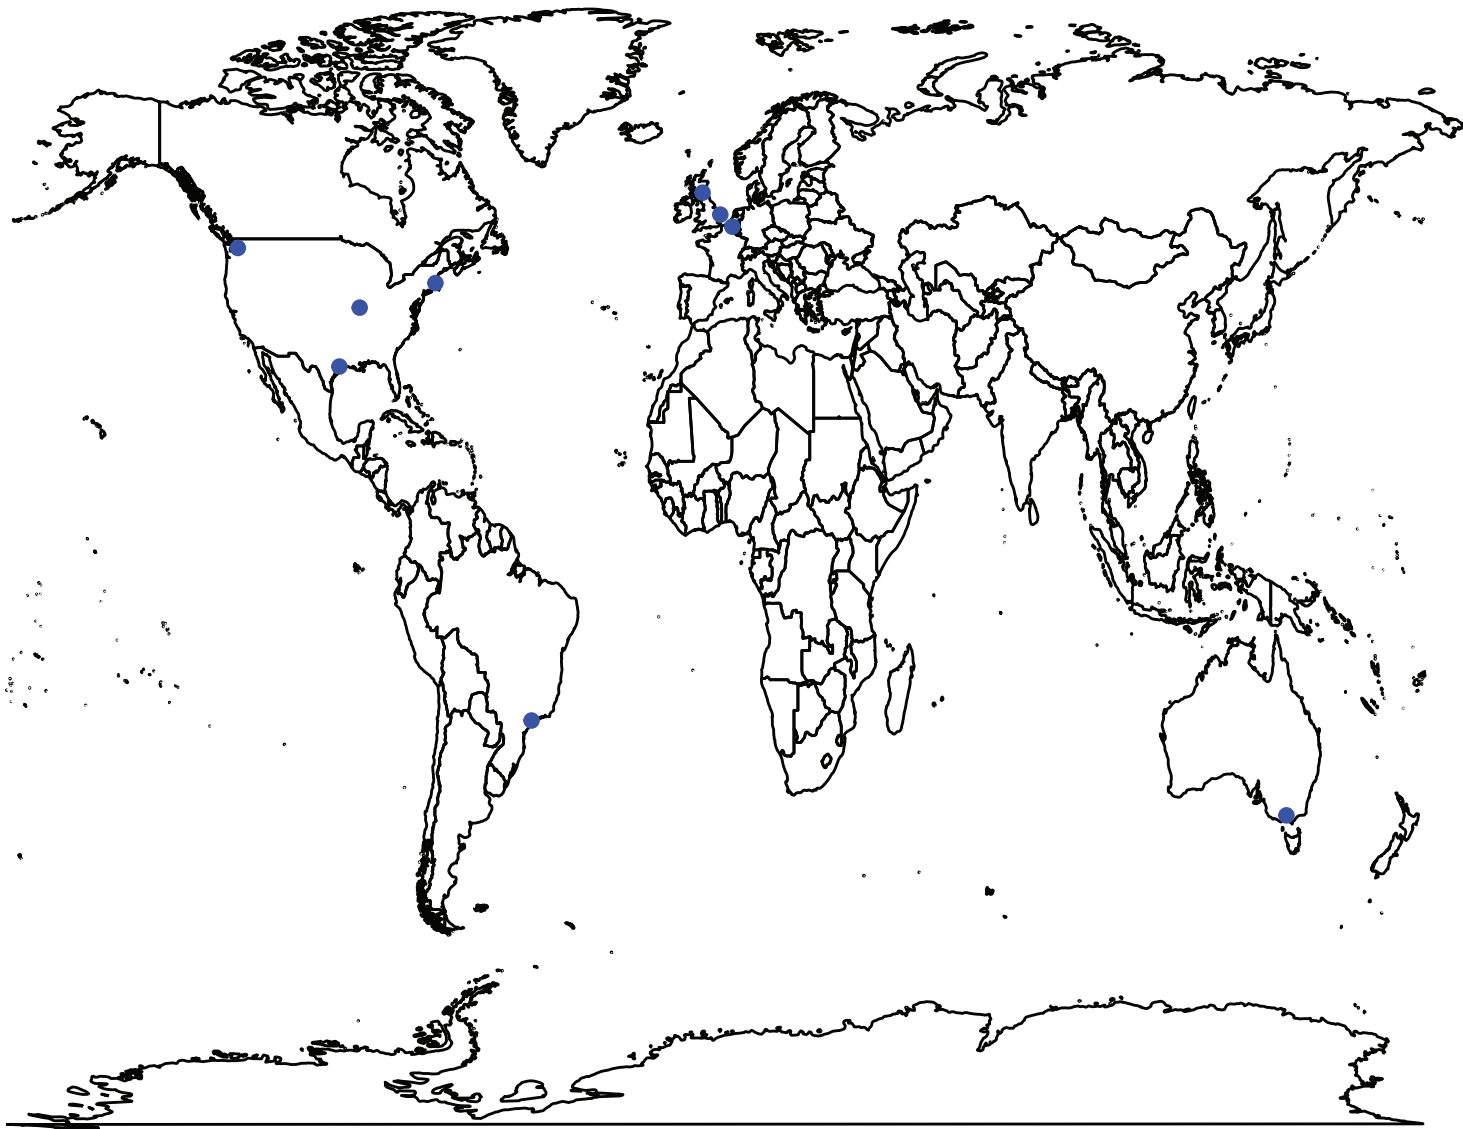

**Figure S4.** Geographic distribution of *qacA4*-carrying *Staphylococcus epidermidis* isolates collected outside of our study. A blue dot represents a center from which a *qacA4*-carrying *S. epidermidis* was identified.

**Table S1.** BioSample accession numbers and phenotypic data for the isolates sequenced in this study. The CHG MIC is measured in  $\mu\text{g/mL}$ . “R” denotes the isolate is resistant to the specified antimicrobial and “S” indicates the isolate is susceptible to the specified antimicrobial.

| Isolate ID                                                                                                                       | BioSample Accession No. | <i>qacA/B</i> RFLP         | <i>qacA</i> allele | <i>smr</i> | CHG MIC | FOX | ERY | CIP | GEN | SXT | LZD | RIF | VAN | ST  |
|----------------------------------------------------------------------------------------------------------------------------------|-------------------------|----------------------------|--------------------|------------|---------|-----|-----|-----|-----|-----|-----|-----|-----|-----|
| <i>The initial 10 qacAB<sub>273</sub>-positive isolates with elevated CHG MICs randomly selected for whole-genome sequencing</i> |                         |                            |                    |            |         |     |     |     |     |     |     |     |     |     |
| 53.1                                                                                                                             | SAMN07839754            | <i>qacAB<sub>273</sub></i> | <i>qacA4*</i>      | No         | 4       | R   | R   | R   | R   | R   | S   | S   | S   | 2   |
| 73.1                                                                                                                             | SAMN07839755            | <i>qacAB<sub>273</sub></i> | <i>qacA4</i>       | Yes        | 4       | R   | R   | R   | R   | R   | S   | S   | S   | 2   |
| 87.7                                                                                                                             | SAMN07839756            | <i>qacAB<sub>273</sub></i> | <i>qacA4</i>       | Yes        | 4       | R   | R   | R   | R   | R   | S   | S   | S   | 2   |
| 91.2                                                                                                                             | SAMN07839757            | <i>qacAB<sub>273</sub></i> | <i>qacA4</i>       | Yes        | 4       | R   | R   | R   | S   | R   | S   | S   | S   | 2   |
| 98.1                                                                                                                             | SAMN07839758            | <i>qacAB<sub>273</sub></i> | <i>qacA4</i>       | Yes        | 4       | R   | R   | R   | R   | R   | S   | S   | S   | 2   |
| 101.1                                                                                                                            | SAMN07839759            | <i>qacAB<sub>273</sub></i> | <i>qacA4</i>       | Yes        | 4       | R   | R   | R   | R   | R   | S   | S   | S   | 2   |
| 107.2                                                                                                                            | SAMN07839760            | <i>qacAB<sub>273</sub></i> | <i>qacA4</i>       | No         | 4       | R   | R   | R   | R   | R   | S   | S   | S   | 2   |
| 123.3                                                                                                                            | SAMN07839761            | <i>qacAB<sub>273</sub></i> | <i>qacA4</i>       | Yes        | 4       | R   | R   | R   | R   | R   | S   | S   | S   | 2   |
| 134.11                                                                                                                           | SAMN07839762            | <i>qacAB<sub>273</sub></i> | <i>qacA4</i>       | Yes        | 4       | R   | R   | R   | R   | R   | S   | S   | S   | 2   |
| 169.1                                                                                                                            | SAMN07839763            | <i>qacAB<sub>273</sub></i> | <i>qacA4</i>       | Yes        | 4       | R   | R   | R   | R   | R   | S   | S   | S   | 2   |
| <i>The 10 qacA-positive isolates without elevated CHG MICs randomly selected as positive controls</i>                            |                         |                            |                    |            |         |     |     |     |     |     |     |     |     |     |
| 20.1                                                                                                                             | SAMN07839764            | <i>qacA</i>                | <i>qacA3</i>       | No         | 1       | R   | R   | S   | S   | R   | S   | S   | S   | 101 |
| 66.3                                                                                                                             | SAMN07839765            | <i>qacA</i>                | <i>qacA7</i>       | No         | 2       | R   | S   | R   | S   | R   | S   | S   | S   | 83  |
| 68.5                                                                                                                             | SAMN07839766            | <i>qacA</i>                | <i>qacA8</i>       | No         | 2       | S   | R   | S   | S   | R   | S   | S   | S   | 7   |
| 97.1                                                                                                                             | SAMN07839767            | <i>qacA</i>                | <i>qacA8</i>       | No         | 2       | S   | R   | S   | S   | S   | S   | S   | S   | 59  |

|                                                                              |              |                            |               |     |     |   |   |   |   |   |   |   |   |     |
|------------------------------------------------------------------------------|--------------|----------------------------|---------------|-----|-----|---|---|---|---|---|---|---|---|-----|
| 99.1                                                                         | SAMN07839768 | <i>qacA</i>                | <i>qacA9</i>  | No  | 1   | R | R | S | S | R | S | S | S | 290 |
| 106.1                                                                        | SAMN07839769 | <i>qacA</i>                | <i>qacA9</i>  | No  | 2   | S | R | S | S | S | S | S | S | 846 |
| 110.3                                                                        | SAMN07839770 | <i>qacA</i>                | <i>qacA10</i> | No  | 2   | R | S | R | R | R | S | S | S | 130 |
| 128.1                                                                        | SAMN07839771 | <i>qacA</i>                | <i>qacA10</i> | No  | 1   | S | S | S | S | S | S | S | S | 88  |
| 131.1                                                                        | SAMN07839772 | <i>qacA</i>                | <i>qacA9</i>  | No  | 2   | R | R | R | R | R | S | S | S | 2   |
| 135.2                                                                        | SAMN07839773 | <i>qacA</i>                | <i>qacA11</i> | No  | 1   | R | R | S | R | R | S | S | S | 88  |
| <i>The 4 qacB-positive isolates randomly selected as positive controls</i>   |              |                            |               |     |     |   |   |   |   |   |   |   |   |     |
| 54.2                                                                         | SAMN07839774 | <i>qacB</i>                |               | No  | 1   | S | S | S | S | S | S | S | S | 358 |
| 81.4                                                                         | SAMN07839775 | <i>qacB</i>                |               | No  | 1   | R | S | S | S | S | S | S | S | 5   |
| 156.3                                                                        | SAMN07839776 | <i>qacB</i>                |               | Yes | 2   | S | R | S | S | S | S | S | S | 358 |
| 174.1                                                                        | SAMN07839777 | <i>qacB</i>                |               | No  | 1   | R | R | S | S | S | S | S | S | 224 |
| <i>The 2 qacAB<sub>273</sub>-positive isolates without elevated CHG MICs</i> |              |                            |               |     |     |   |   |   |   |   |   |   |   |     |
| 36.5                                                                         | SAMN10232702 | <i>qacAB<sub>273</sub></i> | <i>qacA5</i>  | No  | 1   | R | S | R | S | R | S | S | S | 83  |
| 125.10                                                                       | SAMN10232703 | <i>qacAB<sub>273</sub></i> | <i>qacA6</i>  | No  | 0.5 | S | R | S | S | S | S | S | S | †   |
| <i>The 9 qacA-positive isolates with elevated CHG MICs</i>                   |              |                            |               |     |     |   |   |   |   |   |   |   |   |     |
| 15.1                                                                         | SAMN10232693 | <i>qacA</i>                | <i>qacA12</i> | No  | 4   | R | R | R | R | R | S | S | S | 2   |
| 36.3                                                                         | SAMN10232698 | <i>qacA</i>                | <i>qacA13</i> | No  | 4   | R | R | R | R | R | S | S | S | 2   |
| 36.4                                                                         | SAMN10232699 | <i>qacA</i>                | <i>qacA13</i> | No  | 4   | S | R | R | R | R | S | S | S | 2   |
| 39.7                                                                         | SAMN10232694 | <i>qacA</i>                | <i>qacA12</i> | No  | 4   | R | R | R | R | R | S | S | S | 2   |
| 86.4                                                                         | SAMN10232700 | <i>qacA</i>                | <i>qacA10</i> | No  | 4   | R | R | S | S | S | S | S | S | 130 |

|                                                                                                                                                    |              |                            |               |     |   |   |   |   |   |   |   |   |   |   |
|----------------------------------------------------------------------------------------------------------------------------------------------------|--------------|----------------------------|---------------|-----|---|---|---|---|---|---|---|---|---|---|
| 96.5                                                                                                                                               | SAMN10232701 | <i>qacA</i>                | <i>qacA14</i> | Yes | 4 | R | R | R | R | R | S | S | S | 2 |
| 125.1                                                                                                                                              | SAMN10232695 | <i>qacA</i>                | <i>qacA12</i> | No  | 4 | R | R | R | R | R | S | S | S | 2 |
| 125.3                                                                                                                                              | SAMN10232696 | <i>qacA</i>                | <i>qacA12</i> | No  | 4 | R | R | I | R | R | S | S | S | 2 |
| 125.8                                                                                                                                              | SAMN10232697 | <i>qacA</i>                | <i>qacA12</i> | No  | 4 | R | R | R | R | R | S | S | S | 2 |
| <i>The isolate cured of qacA4</i>                                                                                                                  |              |                            |               |     |   |   |   |   |   |   |   |   |   |   |
| 107.2 <sub>cured</sub>                                                                                                                             | SAMN10490861 | Negative                   |               | No  | 1 | R | R | R | R | R | S | S | S | 2 |
| <i>The 5 qacAB<sub>273</sub>-positive isolates with discordant susceptibility patterns (susceptible to ceftiofur, gentamicin, or erythromycin)</i> |              |                            |               |     |   |   |   |   |   |   |   |   |   |   |
| 73.5                                                                                                                                               | SAMN10232704 | <i>qacAB<sub>273</sub></i> | <i>qacA4</i>  | No  | 4 | R | R | I | S | R | S | S | S | 2 |
| 134.15                                                                                                                                             | SAMN10232705 | <i>qacAB<sub>273</sub></i> | <i>qacA4</i>  | Yes | 4 | S | R | R | R | R | S | S | S | 2 |
| 171.1                                                                                                                                              | SAMN10232706 | <i>qacAB<sub>273</sub></i> | <i>qacA4</i>  | Yes | 4 | R | S | R | R | R | S | S | S | 2 |
| 171.10                                                                                                                                             | SAMN10232707 | <i>qacAB<sub>273</sub></i> | <i>qacA4</i>  | Yes | 4 | R | S | R | R | R | S | S | S | 2 |
| 173.6                                                                                                                                              | SAMN10232708 | <i>qacAB<sub>273</sub></i> | <i>qacA4</i>  | Yes | 4 | R | S | R | R | R | S | S | S | 2 |

\* Isolate 53.1 contained two *qacA* alleles, with one being *qacA4*.

† MLST was not performed on isolate 125.10 as it identified as *Staphylococcus hominis*.

**Table S2.** GenBank accession numbers of the previously characterized *qacA* alleles and the 11 novel *qacA* alleles identified in this study.

| <i>qacA</i> Allele | GenBank Accession No. | First reported                                                 |
|--------------------|-----------------------|----------------------------------------------------------------|
| <i>qacA1</i>       | GU565967              | (Alam et al., 2003). Previously described as “qacA prototype.” |
| <i>qacA2</i>       | N/A                   | (Alam et al., 2003). Previously described as “qacA-V1.”        |
| <i>qacA3</i>       | MK040371              | (Alam et al., 2003). Previously described as “qacA-V2.”        |
| <i>qacA4</i>       | MK040360              | This study.                                                    |
| <i>qacA5</i>       | MK040361              | This study.                                                    |
| <i>qacA6</i>       | MK040362              | This study.                                                    |
| <i>qacA7</i>       | MK040363              | This study.                                                    |
| <i>qacA8</i>       | MK040364              | This study.                                                    |
| <i>qacA9</i>       | MK040365              | This study.                                                    |
| <i>qacA10</i>      | MK040366              | This study.                                                    |
| <i>qacA11</i>      | MK040367              | This study.                                                    |
| <i>qacA12</i>      | MK040368              | This study.                                                    |
| <i>qacA13</i>      | MK040369              | This study.                                                    |
| <i>qacA14</i>      | MK040370              | This study.                                                    |



**Table S3.** SNV matrix obtained from a core genome analysis of *S. epidermidis* ST2 isolates sequenced in our study using BPH0662 as the reference genome.

|            |         | Isolate ID |       |       |      |      |      |      |       |       |       |        |       |       |       |      |      |      |      |      |
|------------|---------|------------|-------|-------|------|------|------|------|-------|-------|-------|--------|-------|-------|-------|------|------|------|------|------|
|            |         | BPH0662    | 169.1 | 131.1 | 73.1 | 87.7 | 91.2 | 98.1 | 101.1 | 107.2 | 123.3 | 134.11 | 125.1 | 125.3 | 125.8 | 15.1 | 36.3 | 36.4 | 39.7 | 96.5 |
| Isolate ID | BPH0662 |            |       |       |      |      |      |      |       |       |       |        |       |       |       |      |      |      |      |      |
|            | 169.1   | 2163       |       |       |      |      |      |      |       |       |       |        |       |       |       |      |      |      |      |      |
|            | 131.1   | 2093       | 272   |       |      |      |      |      |       |       |       |        |       |       |       |      |      |      |      |      |
|            | 73.1    | 2186       | 63    | 295   |      |      |      |      |       |       |       |        |       |       |       |      |      |      |      |      |
|            | 87.7    | 2177       | 78    | 286   | 101  |      |      |      |       |       |       |        |       |       |       |      |      |      |      |      |
|            | 91.2    | 2172       | 77    | 281   | 100  | 91   |      |      |       |       |       |        |       |       |       |      |      |      |      |      |
|            | 98.1    | 2161       | 62    | 270   | 85   | 76   | 75   |      |       |       |       |        |       |       |       |      |      |      |      |      |
|            | 101.1   | 2163       | 40    | 272   | 63   | 78   | 77   | 62   |       |       |       |        |       |       |       |      |      |      |      |      |
|            | 107.2   | 2182       | 85    | 291   | 108  | 99   | 96   | 83   | 85    |       |       |        |       |       |       |      |      |      |      |      |
|            | 123.3   | 2184       | 87    | 293   | 110  | 91   | 100  | 85   | 87    | 108   |       |        |       |       |       |      |      |      |      |      |
|            | 134.11  | 2163       | 64    | 272   | 87   | 78   | 77   | 54   | 64    | 85    | 87    |        |       |       |       |      |      |      |      |      |
|            | 125.1   | 2005       | 330   | 248   | 353  | 344  | 339  | 328  | 330   | 349   | 351   | 330    |       |       |       |      |      |      |      |      |
|            | 125.3   | 2005       | 330   | 248   | 353  | 344  | 339  | 328  | 330   | 349   | 351   | 330    | 0     |       |       |      |      |      |      |      |
|            | 125.8   | 2004       | 333   | 251   | 356  | 347  | 342  | 331  | 333   | 352   | 354   | 333    | 3     | 3     |       |      |      |      |      |      |
|            | 15.1    | 2001       | 326   | 244   | 349  | 340  | 335  | 324  | 326   | 345   | 347   | 326    | 34    | 34    | 37    |      |      |      |      |      |
|            | 36.3    | 1904       | 491   | 419   | 514  | 505  | 500  | 489  | 491   | 510   | 512   | 491    | 315   | 315   | 314   | 311  |      |      |      |      |
|            | 36.4    | 1905       | 492   | 420   | 515  | 506  | 501  | 490  | 492   | 511   | 513   | 492    | 316   | 316   | 315   | 312  | 1    |      |      |      |
|            | 39.7    | 2012       | 337   | 255   | 360  | 351  | 346  | 335  | 337   | 356   | 358   | 337    | 41    | 41    | 44    | 41   | 322  | 323  |      |      |
| 96.5       | 2135    | 38         | 244   | 61    | 42   | 51   | 36   | 38   | 59    | 49    | 38    | 302    | 302   | 305   | 298   | 463  | 464  | 309  |      |      |

**Table S4.** *Staphylococcus epidermidis* carrying *qacA4* sequenced in other projects.

| Isolate ID | BioSample Accession No. | BioProject  | Collection Location                | Collection Date | Source                 | <i>qacA</i> Allele | pAQZ1    | ST | Reference         |
|------------|-------------------------|-------------|------------------------------------|-----------------|------------------------|--------------------|----------|----|-------------------|
| 13A1       | SAMN12037431            | PRJNA415995 | Seattle, Washington, United States | 2010            | Skin                   | <i>qacA4</i>       | Yes      | 2  | Soma et al., 2012 |
| AUS16      | SAMN09093621            | PRJNA470534 | Melbourne, Australia               | 2017            | Blood                  | <i>qacA4</i>       | Partial† | 2  | Lee et al., 2018  |
| UK01       | SAMN09103953            | PRJNA470752 | East England, United Kingdom       | 2015            | Blood                  | <i>qacA4</i>       | Yes      | 2  | Lee et al., 2018  |
| BEL14      | SAMN09103870            | PRJNA470752 | Brussels, Belgium                  | 2017            | Blood                  | <i>qacA4</i>       | Partial† | 2  | Lee et al., 2018  |
| MB503      | SAMN08558266            | PRJNA434275 | Houston, Texas, United States      | 2014            | Blood                  | <i>qacA4</i>       | Yes      | 2  | Li et al., 2018   |
| MB591      | SAMN08558277            | PRJNA434275 | Houston, Texas, United States      | 2014            | Blood                  | <i>qacA4*</i>      | Yes      | 2  | Li et al., 2018   |
| MB1595     | SAMN08558194            | PRJNA434275 | Houston, Texas, United States      | 2015            | Blood                  | <i>qacA4</i>       | Partial† | 2  | Li et al., 2018   |
| MB1617     | SAMN08558196            | PRJNA434275 | Houston, Texas, United States      | 2015            | Blood                  | <i>qacA4</i>       | Yes      | 2  | Li et al., 2018   |
| MB1708     | SAMN08558205            | PRJNA434275 | Houston, Texas, United States      | 2015            | Blood                  | <i>qacA4</i>       | Yes      | 2  | Li et al., 2018   |
| MB2095     | SAMN08558235            | PRJNA434275 | Houston, Texas, United States      | 2016            | Blood                  | <i>qacA4**</i>     | Yes      | 2  | Li et al., 2018   |
| MB4623     | SAMN08558260            | PRJNA434275 | Houston, Texas, United States      | 2014            | Blood                  | <i>qacA4</i>       | Yes      | 2  | Li et al., 2018   |
| HMSC058E12 | SAMN04498569            | PRJNA296153 | St. Louis, Missouri, United States | Unknown         | Gastrointestinal Tract | <i>qacA4</i>       | Yes      | 2  |                   |
| 273        | SAMN06015656            | PRJNA278886 | Boston, Massachusetts,             | 2016            | Blood                  | <i>qacA4</i>       | Yes      | 2  |                   |

|             |              |             |                                    |             |                             |              |         |   |                    |
|-------------|--------------|-------------|------------------------------------|-------------|-----------------------------|--------------|---------|---|--------------------|
|             |              |             | United States                      |             |                             |              |         |   |                    |
| NGS-ED-1107 | SAMN03396260 | PRJNA255947 | Edinburgh, United Kingdom          | 2013        | Blood                       | <i>qacA4</i> | Unknown | 2 | Walsh et al., 2015 |
| NGS-ED-1110 | SAMN03396286 | PRJNA255947 | Edinburgh, United Kingdom          | 2013        | Blood                       | <i>qacA4</i> | Unknown | 2 | Walsh et al., 2015 |
| NGS-ED-1111 | SAMN03396287 | PRJNA255947 | Edinburgh, United Kingdom          | 2013        | Blood                       | <i>qacA4</i> | Unknown | 2 | Walsh et al., 2015 |
| NGS-ED-1117 | SAMN03396288 | PRJNA255947 | Edinburgh, United Kingdom          | 2013        | Blood                       | <i>qacA4</i> | Unknown | 2 | Walsh et al., 2015 |
| NGS-ED-1118 | SAMN03396289 | PRJNA255947 | Edinburgh, United Kingdom          | 2013        | Blood                       | <i>qacA4</i> | Unknown | 2 | Walsh et al., 2015 |
| SH03_17     | SAMN08095611 | PRJNA419705 | São Paulo, Brazil                  | 2017        | Blood                       | <i>qacA4</i> | Unknown | 2 |                    |
| 6_SEPI      | SAMN03197799 | PRJNA267549 | Seattle, Washington, United States | 2012 - 2013 | Urine                       | <i>qacA4</i> | Yes     | 2 | Roach et al., 2015 |
| 8_SEPI      | SAMN03198012 | PRJNA267549 | Seattle, Washington, United States | 2012 - 2013 | Urine                       | <i>qacA4</i> | Yes     | 2 | Roach et al., 2015 |
| 15_SEPI     | SAMN03197339 | PRJNA267549 | Seattle, Washington, United States | 2012 - 2013 | Bronchoalveolar Lavage      | <i>qacA4</i> | Yes     | 2 | Roach et al., 2015 |
| 16_SEPI     | SAMN03197351 | PRJNA267549 | Seattle, Washington, United States | 2012 - 2013 | Bronchoalveolar Lavage      | <i>qacA4</i> | Yes     | 2 | Roach et al., 2015 |
| 21_SEPI     | SAMN03197402 | PRJNA267549 | Seattle, Washington, United States | 2012 - 2013 | Bronchoalveolar Lavage      | <i>qacA4</i> | Yes     | 2 | Roach et al., 2015 |
| 92_SEPI     | SAMN03198134 | PRJNA267549 | Seattle, Washington, United States | 2012 - 2013 | Bronchoalveolar Lavage      | <i>qacA4</i> | Yes     | 2 | Roach et al., 2015 |
| 101_SEPI    | SAMN03196971 | PRJNA267549 | Seattle, Washington, United States | 2012 - 2013 | Intracutaneous Line Segment | <i>qacA4</i> | Yes     | 2 | Roach et al., 2015 |

|           |              |             |                                    |             |                        |              |                       |     |                    |
|-----------|--------------|-------------|------------------------------------|-------------|------------------------|--------------|-----------------------|-----|--------------------|
| 364_SEPI  | SAMN03197554 | PRJNA267549 | Seattle, Washington, United States | 2012 - 2013 | Bronchoalveolar Lavage | <i>qacA4</i> | Yes                   | 2   | Roach et al., 2015 |
| 366_SEPI  | SAMN03197556 | PRJNA267549 | Seattle, Washington, United States | 2012 - 2013 | Bronchoalveolar Lavage | <i>qacA4</i> | Yes                   | 2   | Roach et al., 2015 |
| 386_SEPI  | SAMN03197577 | PRJNA267549 | Seattle, Washington, United States | 2012 - 2013 | Wound                  | <i>qacA4</i> | Partial <sup>††</sup> | 2   | Roach et al., 2015 |
| 642_SEPI  | SAMN03197843 | PRJNA267549 | Seattle, Washington, United States | 2012 - 2013 | Blood                  | <i>qacA4</i> | Yes                   | 2   | Roach et al., 2015 |
| 795_SEPI  | SAMN03198008 | PRJNA267549 | Seattle, Washington, United States | 2012 - 2013 | Blood                  | <i>qacA4</i> | Partial <sup>†</sup>  | 847 | Roach et al., 2015 |
| 798_SEPI  | SAMN03198010 | PRJNA267549 | Seattle, Washington, United States | 2012 - 2013 | Blood                  | <i>qacA4</i> | Partial <sup>†</sup>  | 847 | Roach et al., 2015 |
| 802_SEPI  | SAMN03198016 | PRJNA267549 | Seattle, Washington, United States | 2012 - 2013 | Blood                  | <i>qacA4</i> | Yes                   | 847 | Roach et al., 2015 |
| 803_SEPI  | SAMN03198017 | PRJNA267549 | Seattle, Washington, United States | 2012 - 2013 | Blood                  | <i>qacA4</i> | Yes                   | 847 | Roach et al., 2015 |
| 821_SEPI  | SAMN03198036 | PRJNA267549 | Seattle, Washington, United States | 2012 - 2013 | Bronchoalveolar Lavage | <i>qacA4</i> | Yes                   | 2   | Roach et al., 2015 |
| 872_SEPI  | SAMN03198079 | PRJNA267549 | Seattle, Washington, United States | 2012 - 2013 | Tissue                 | <i>qacA4</i> | Yes                   | 2   | Roach et al., 2015 |
| 961_SEPI  | SAMN03198181 | PRJNA267549 | Seattle, Washington, United States | 2012 - 2013 | Fluid                  | <i>qacA4</i> | Yes                   | 2   | Roach et al., 2015 |
| 1040_SEPI | SAMN03197006 | PRJNA267549 | Seattle, Washington, United States | 2012 - 2013 | Blood                  | <i>qacA4</i> | Yes                   | 2   | Roach et al., 2015 |
| 1295_SEPI | SAMN03197267 | PRJNA267549 | Seattle, Washington, United States | 2012 - 2013 | Urine                  | <i>qacA4</i> | Yes                   | 2   | Roach et al., 2015 |

\*The *qac* gene in isolate MB591 contained the two coding changes but not the synonymous mutation of *qacA4*.

\*\*Isolate MB2095 appeared to contain two *qacA* alleles, with one being *qacA4*.

†Five isolates (AUS16, BEL14, MB1595, 795\_SEPI and 798\_SEPI) appeared to lack a 4.6 kb segment of the pAQZ1 plasmid.

††Isolate 386\_SEPI appeared to lack a 10.4 kb segment of the pAQZ1 plasmid.

## References

1. Alam MM, Kobayashi N, Uehara N, Watanabe N. 2003. Analysis on Distribution and Genomic Diversity of High-Level Antiseptic Resistance Genes *qacA* and *qacB* in Human Clinical Isolates of *Staphylococcus aureus*. *Microbial Drug Resistance* 9:109–121
2. Soma V, Qin X, Zhou C, Adler A, Berry J, Zerr D. 2012. The effects of daily chlorhexidine bathing on cutaneous bacterial isolates: a pilot study. *Infection and Drug Resistance* 5:75–78.
3. Roach DJ, Burton JN, Lee C, Stackhouse B, Butler-Wu SM, Cookson BT, Shendure J, Salipante SJ. 2015. A Year of Infection in the Intensive Care Unit: Prospective Whole Genome Sequencing of Bacterial Clinical Isolates Reveals Cryptic Transmissions and Novel Microbiota. *PLOS Genetics* 11:e1005413.
4. Lee JYH, Monk IR, Gonçalves da Silva A, Seemann T, Chua KYL, Kearns A, Hill R, Woodford N, Bartels MD, Strommenger B, Laurent F, Dodémont M, Deplano A, Patel R, Larsen AR, Korman TM, Stinear TP, Howden BP. 2018. Global spread of three multidrug-resistant lineages of *Staphylococcus epidermidis*. *Nature Microbiology* 3:1175–1185.
5. Li X, Arias CA, Aitken SL, Galloway Peña J, Panesso D, Chang M, Diaz L, Rios R, Numan Y, Ghaoui S, DebRoy S, Bhatti MM, Simmons DE, Raad I, Hachem R, Folan SA, Sahasarabhojane P, Kalia A, Shelburne SA. 2018. Clonal Emergence of Invasive

Multidrug-Resistant *Staphylococcus epidermidis* Deconvoluted via a Combination of Whole-Genome Sequencing and Microbiome Analyses. *Clinical Infectious Diseases* 67:398–406.

6. Walsh P, Bekaert M, Carroll J, Manning T, Kelly B, O'Driscoll A, Lu X, Smith C, Dickinson P, Templeton K, Ghazal P, Sleator RD. 2015. Draft Genome Sequences of Six Different *Staphylococcus epidermidis* Clones, Isolated Individually from Preterm Neonates Presenting with Sepsis at Edinburgh's Royal Infirmary. *Genome Announcements* 3.
